# Supplementary material for: Remarkable role of positional isomers in the design of sensors for the ratiometric detection of copper and mercury ions in water
Source: Royal Society of Chemistry journal article supplement (doi:10.1039/c3ra45054f), 2013-11-19
Supplement: c3ra45054f.pdf [file c3ra45054f.pdf]

# Remarkable Role of Positional Isomers in the Design of Sensors for the Ratiometric Detection of Copper and Mercury Ions in Water

Namita Kumari,<sup>a</sup> Nilanjan Dey<sup>a</sup> and Santanu Bhattacharya\*<sup>a, b</sup>

<sup>a</sup>Department of Organic Chemistry, Indian Institute of Science, Bangalore 560 012, India and

<sup>b</sup>Chemical Biology Unit, JNCASR, Bangalore 560 064, India.

## Contents

|                                                                                                                       |        |
|-----------------------------------------------------------------------------------------------------------------------|--------|
| 1. Characterization of compound <b>4</b>                                                                              | S2     |
| 2. Interference study for Cu(II) detection using <b>1</b>                                                             | S2     |
| 3. Reversibility study of <b>1</b> -Cu(II) complex using EDTA                                                         | S2     |
| 4. UV-Vis spectra of <b>1</b> with metal ions at pH 7.4 and titration with Cu(II)                                     | S3     |
| 5. UV-Vis titration of sensor <b>2</b> or <b>3</b> in water with Hg <sup>2+</sup>                                     | S4     |
| 6. Interference and reversibility study with <b>2</b> and <b>3</b>                                                    | S5     |
| 7. Study of pH dependence of addition of cations onto the sensors                                                     | S6     |
| 8. Emission spectra of <b>1</b> upon addition of various cations                                                      | S6     |
| 9. Fluorescence titration of <b>2</b> and <b>3</b> with Hg(II) ions in water                                          | S7     |
| 10. Stoichiometry determination and binding constant calculation of <b>1</b> with Cu(II)                              | S7     |
| 11. Stoichiometry determination and binding constant calculation of <b>2</b> and <b>3</b> with Hg(II)                 | S8     |
| 12. Selectivity coefficients of the probes for various cations.                                                       | S9     |
| 13. Mass spectra of sensors with metal ions                                                                           | S9-10  |
| 14. IR spectrum of <b>2</b> and <b>2</b> -Hg <sup>2+</sup>                                                            | S11    |
| 15. IR spectrum of <b>1</b> and <b>1</b> -Cu <sup>2+</sup>                                                            | S11    |
| 16. DFT optimized structure of <b>1</b> -Cu <sup>2+</sup> , <b>2</b> -Hg <sup>2+</sup> and <b>3</b> -Hg <sup>2+</sup> | S12    |
| 17. Detection Cu(II) and Hg(II) in real life water samples using <b>1</b> and <b>3</b>                                | S12-13 |
| 18. Detection of Cu(II) and Hg(II) in presence of excess of BSA and human blood serum using <b>1</b> and <b>3</b>     | S14-15 |
| 19. Scan documents for <sup>1</sup> H and <sup>13</sup> C NMR spectra of compounds ( <b>1-4</b> )                     | S16-19 |

Compound **4**. White solid; (Yield: 39 mg, 74 %),  $^1\text{H}$  NMR (400 MHz,  $\text{CDCl}_3$ )  $\delta$  (ppm) 1.31 (t,  $J = 8$  Hz, 6H), 1.86 (s, 6H), 3.28 (q,  $J = 4$  Hz, 4H), 3.47 (s, 2H), 6.33 (s, 2H), 6.39 (s, 2H), 7.06 (t,  $J = 8$  Hz, 1H), 7.24 (d,  $J = 2.8$  Hz, 4H), 7.47 (t,  $J = 4$  Hz, 2H), 7.50-7.53 (m, 4H), 8.01 (t,  $J = 4$  Hz, 6H), 8.44 (s, 1H);  $^{13}\text{C}$  NMR (100 MHz,  $\text{CDCl}_3$ )  $\delta$  (ppm): 14.6, 16.6, 38.3, 65.7, 96.6, 106.1, 117.9, 123.3, 123.6, 127.4, 127.6, 128.6, 129.5, 133.4, 135.0, 146.3, 147.5, 151.2, 152.2, 165.1; HRMS  $m/z$  calcd for  $\text{C}_{33}\text{H}_{32}\text{N}_4\text{O}_2$  ( $\text{M}+\text{Na}$ ) $^+$  539.2423, found 539.2423.

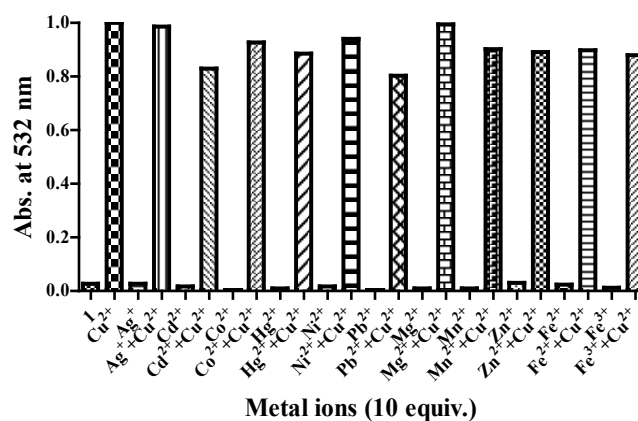

**Fig. S1** Plot of normalized absorbance (at 532 nm) of **1** with added  $\text{Cu}^{2+}$  (2 equiv.) in presence of excess of other metal ions (10 equiv.) in water.

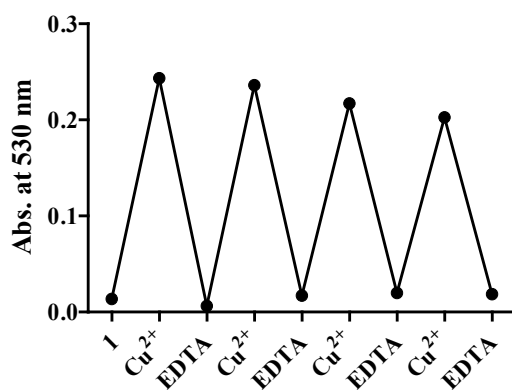

**Fig. S2** Recovery of the molecular absorbance at 530 nm after addition of EDTA (5 equiv.) after each addition of 5 equiv. of  $\text{Cu}^{2+}$  to the sensor **1** (10  $\mu\text{M}$ )

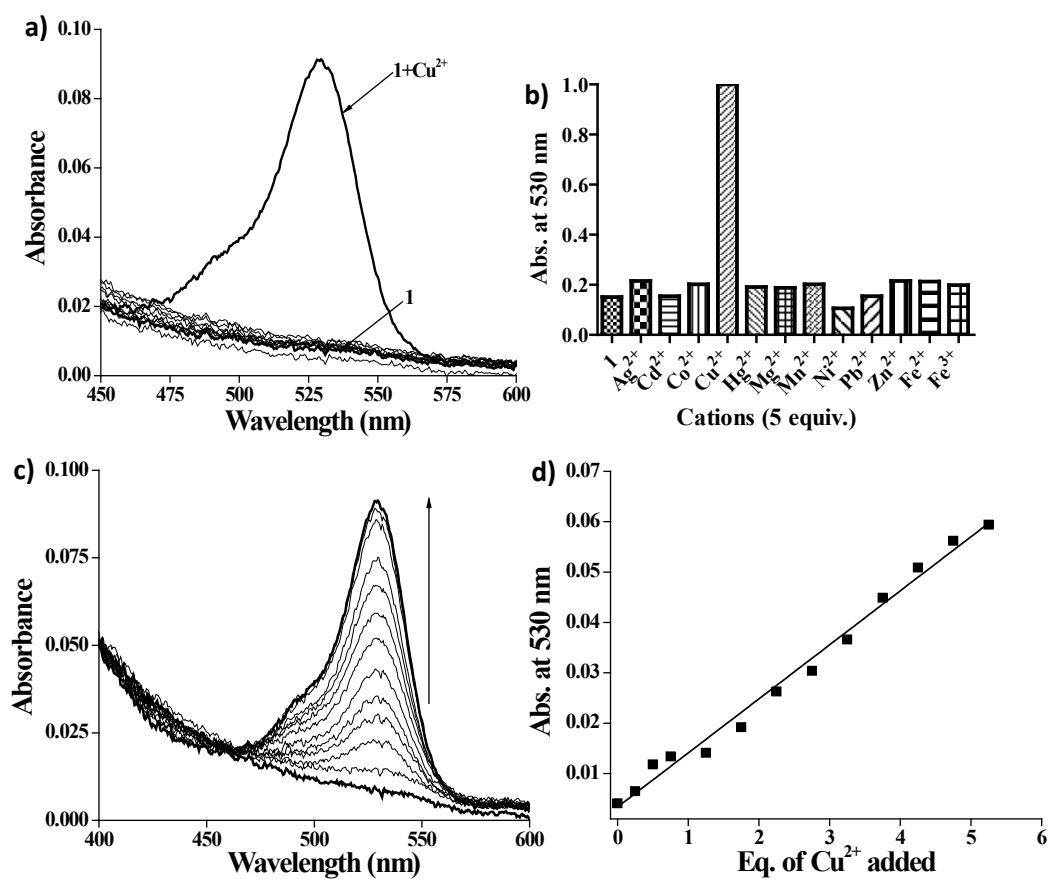

**Fig. S3** (a) Absorption spectral changes of **1** (10 μM) at pH 7.4 (HEPES buffer, 0.05 M) upon addition of 5 equiv. of different salts of Ag<sup>+</sup>, Cd<sup>2+</sup>, Co<sup>2+</sup>, Cu<sup>2+</sup>, Fe<sup>2+</sup>, Fe<sup>3+</sup>, Hg<sup>2+</sup>, Mg<sup>2+</sup>, Mn<sup>2+</sup>, Ni<sup>2+</sup>, Pb<sup>2+</sup> and Zn<sup>2+</sup>. (b) Normalized absorbance of **1** (10 μM) at 530 nm after the addition of various cations (5 equiv.). (c) UV-Vis titration of **1** (10 μM) at pH 7.4 (HEPES buffer, 0.05M) with Cu<sup>2+</sup> (0 to 55 μM). (d) Plot of absorbance at 530 nm against the added equivalent of Cu<sup>2+</sup>.

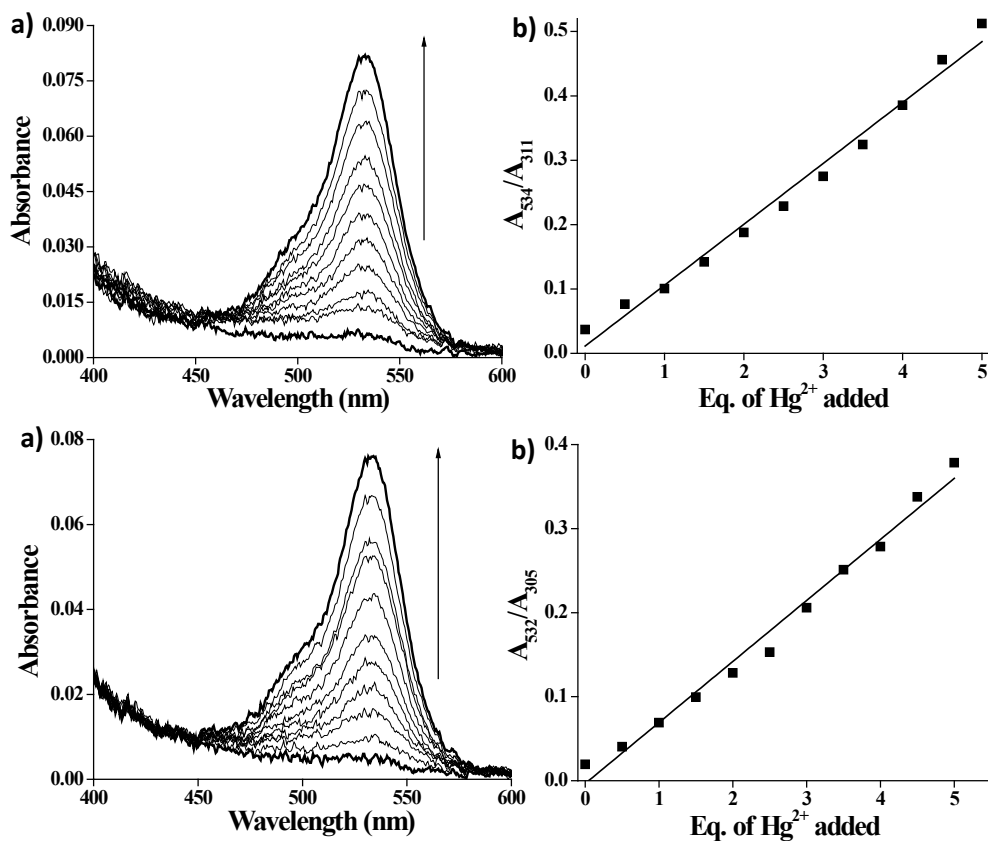

**Fig. S4** Upper panel sensor **2** and lower panel sensor **3**; (a) UV-Vis titration of sensor **2** or **3** (10  $\mu$ M) in water with  $Hg^{2+}$  (0 to 50  $\mu$ M); (b) Ratiometric plot with equiv. of  $Hg^{2+}$  at the absorbance ratio of  $A_{534}/A_{311}$  nm for **2** and  $A_{532}/A_{305}$  nm for **3**.

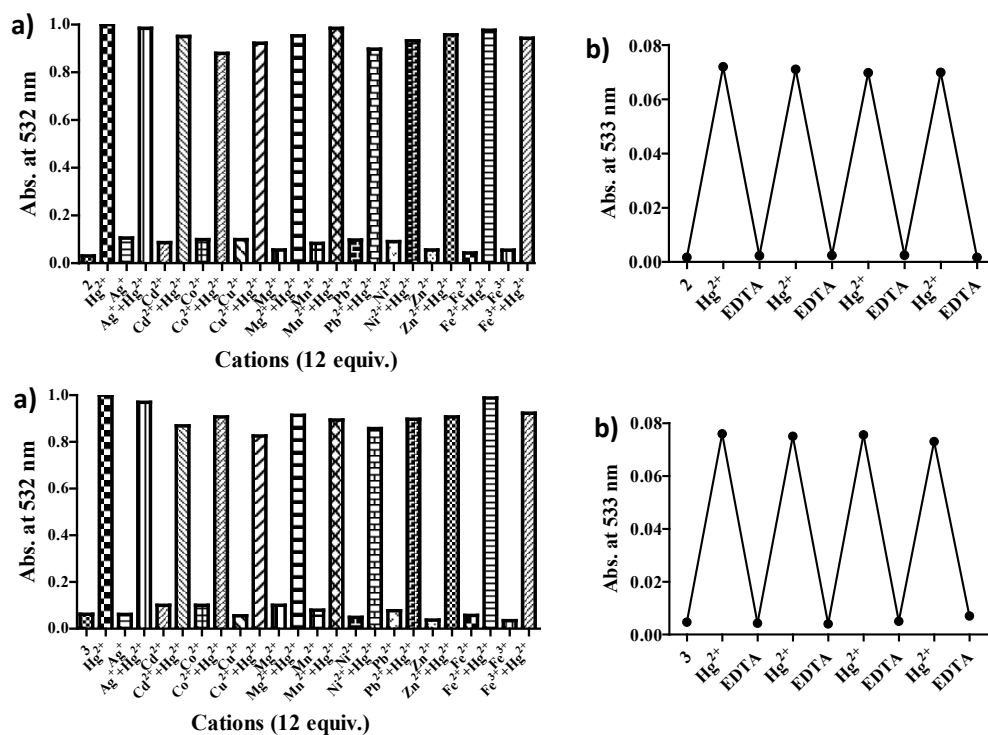

**Fig. S5** Upper panel sensor **2** and lower panel sensor **3**; (a) Plot of normalized absorbance (at 532 nm) of the sensors **2** or **3** with  $\text{Hg}^{2+}$  (4 equiv.) in presence of an excess of other metal ions (12 equiv.). (b) Recovery of the molecular absorbance at 533 nm after addition of EDTA (10 equiv.) after each addition of 5 equiv. of  $\text{Hg}^{2+}$  to the sensor **2** or **3** (10  $\mu\text{M}$ ).

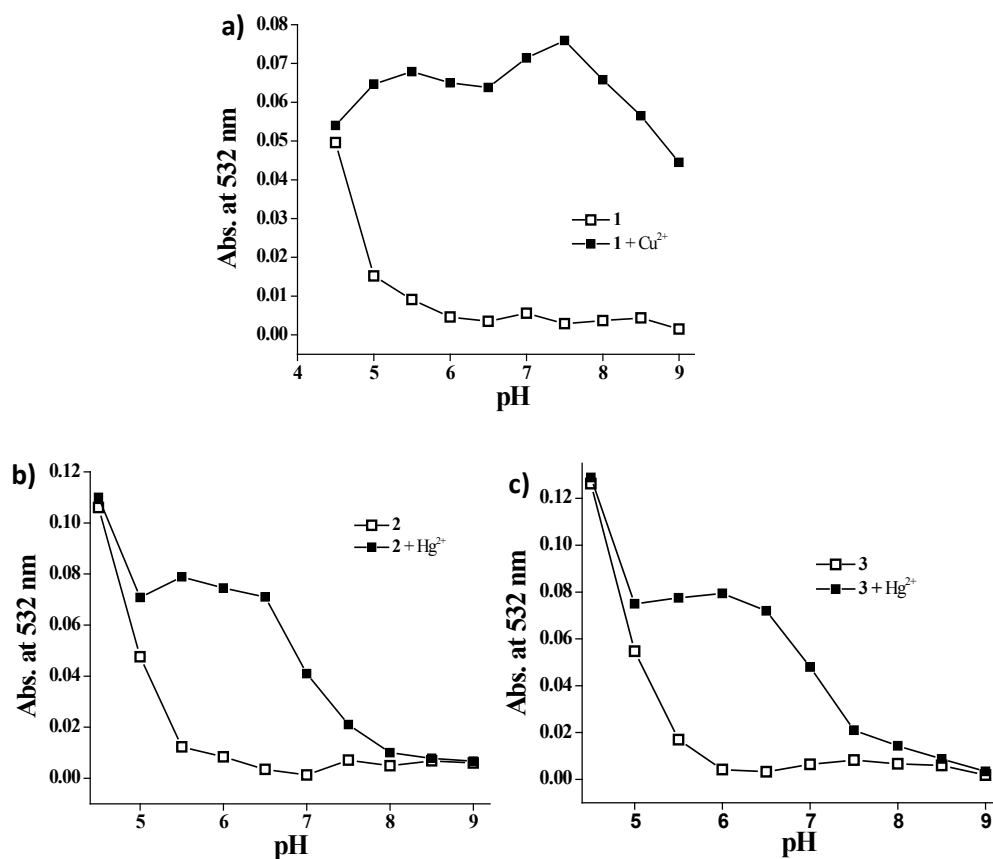

**Fig. S6** (a) Plot of absorbance at 532 nm of **1** (10 μM) and after the addition of 5 equiv. of Cu<sup>2+</sup> ion at different pH. (b) Plot of the absorbance at 532 nm of **2** (10 μM) and after the addition of 5 equiv. of Hg<sup>2+</sup> ion at different pH. (c) Plot of the absorbance at 532 nm of **3** (10 μM) and after the addition of 5 equiv. of Hg<sup>2+</sup> ion at different pH.

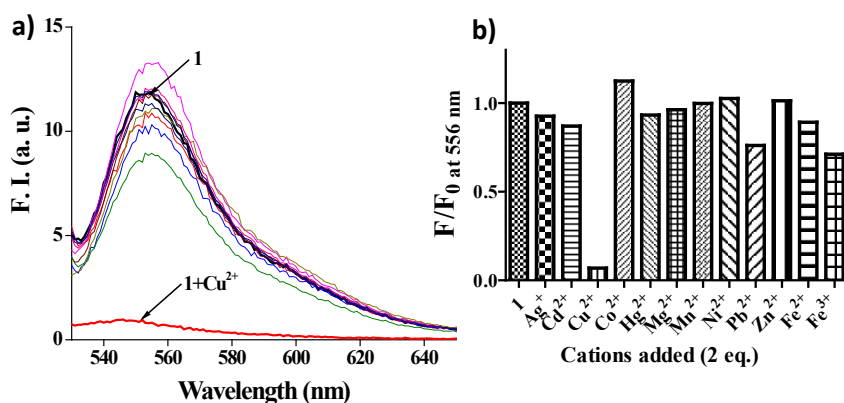

**Fig. S7** (a) Fluorescence emission spectra of **1** (5 μM) in water (λ<sub>ex</sub> = 520 nm) in the presence of various cations (2 equiv.). (b) Normalized spectra of the fluorescence intensity at 556 nm after the addition of each cation.

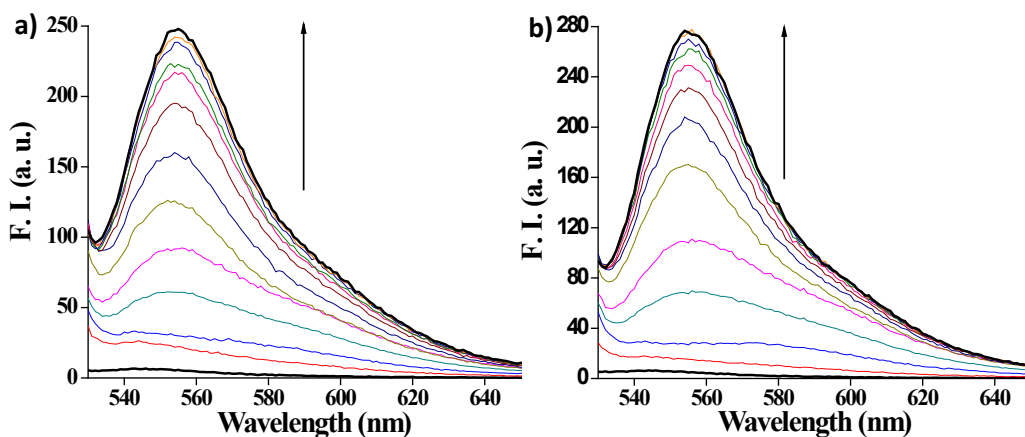

**Fig. S8** Fluorescence titration of sensor (a) **2** and (b) **3** (5  $\mu$ M) in water with Hg<sup>2+</sup> (0 – 5 equiv.) ( $\lambda_{\text{ex}} = 520$  nm).

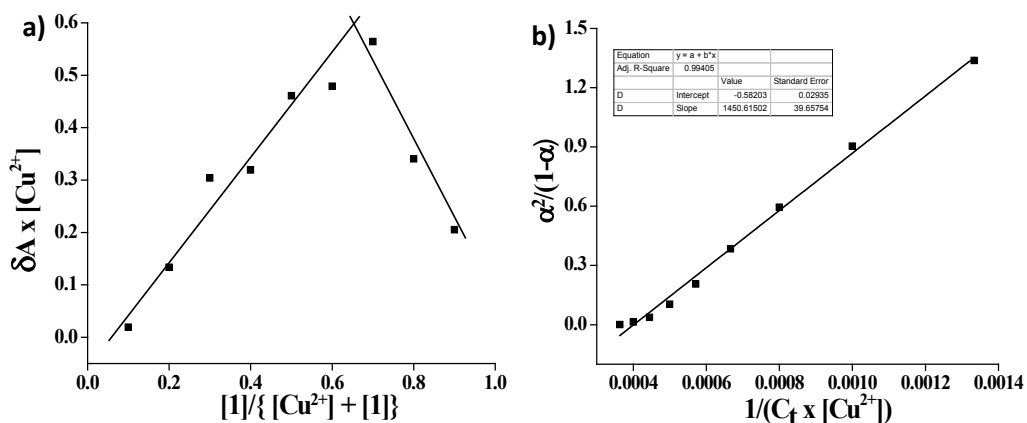

**Fig. S9** (a) Job plot analyses of **1** demonstrating 2:1 binding with the Cu<sup>2+</sup> ion. [ $\delta A$  = change in the absorbance; The total concentration  $[1] + [Cu^{2+}] = 1.0 \times 10^{-4}$  M.] (b) Binding constant was calculated using Benesi-Hildebrand equation for the 2:1 stoichiometry.

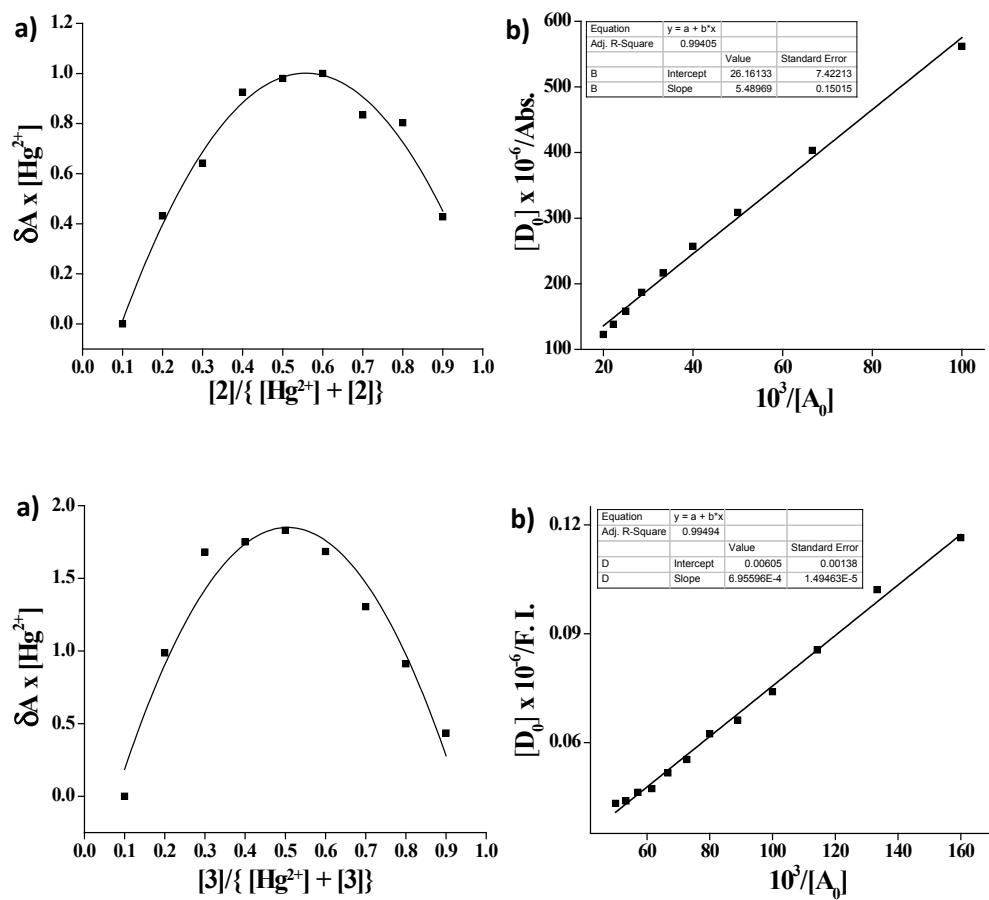

**Fig. S10** Upper panel sensor **2** and lower panel sensor **3**; (a) Job plot analyses of sensor **2** or **3** demonstrating 1:1 binding with  $Hg^{2+}$  ion. ( $\delta A$  = change in the absorbance; The total concentration [sensor] +  $[Hg^{2+}] = 1.0 \times 10^{-4}$  M) (b) Binding constant calculation employed Benesi-Hildebrand equation with 1:1 stoichiometry.



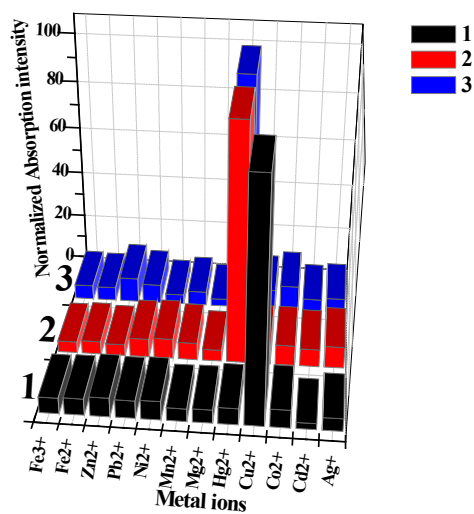

**Fig. S11** The selectivity coefficients for the heavy metal ions in terms of the relative enhancement in absorbance of probe.

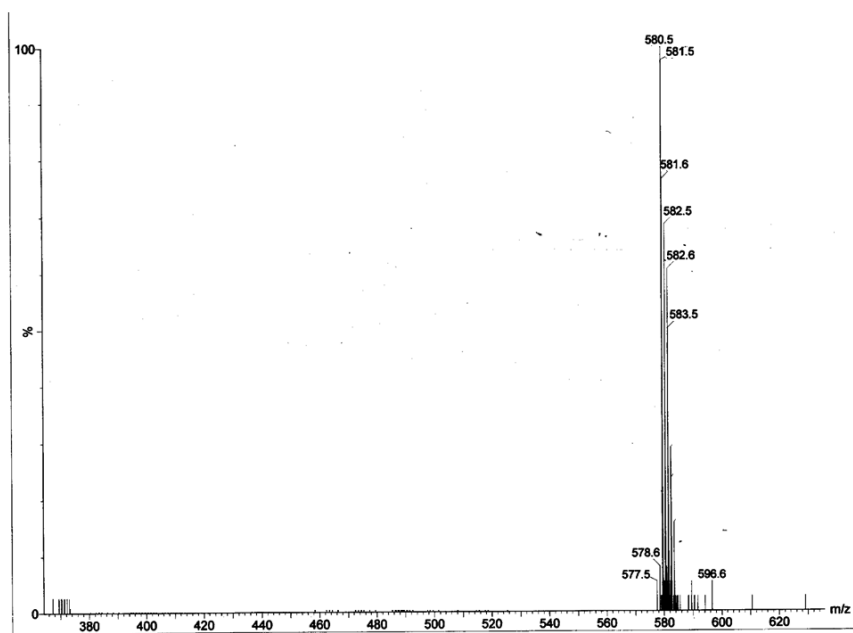

**Fig. S12** Mass spectrum of  $1\text{-Cu}^{2+} [\text{L}_2\text{.Cu.2MeOH}]^{2+}$ .

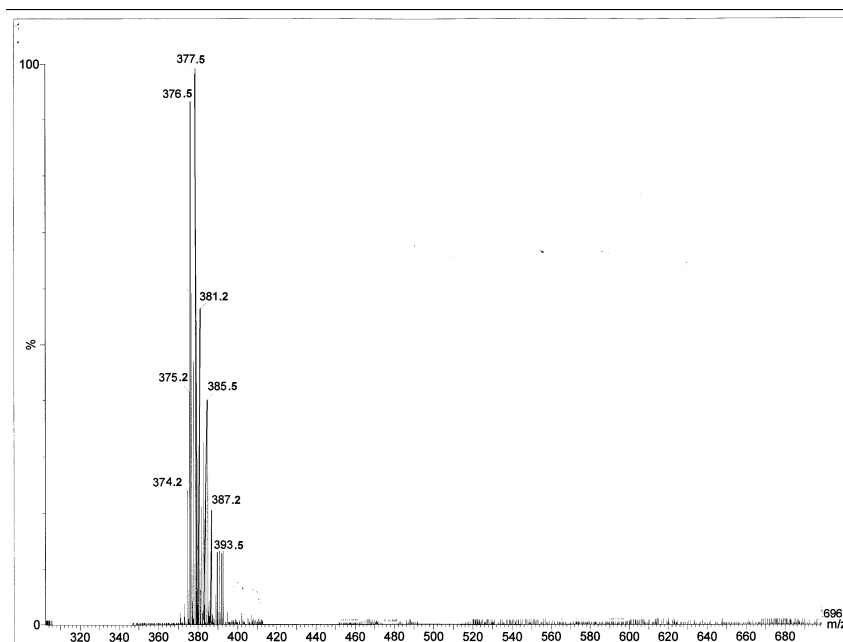

Fig. S13 Mass spectrum of  $2\text{-Hg}^{2+} [\text{L.Hg.2H}_2\text{O}]^{2+}$ .

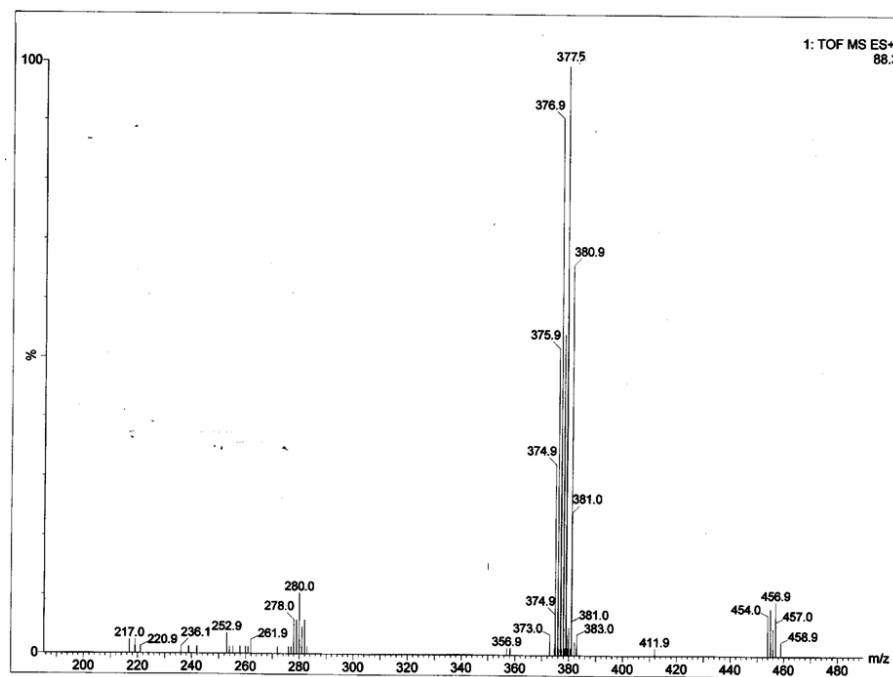

Fig. S14 Mass spectrum of  $3\text{-Hg}^{2+} [\text{L.Hg.2H}_2\text{O}]^{2+}$ .

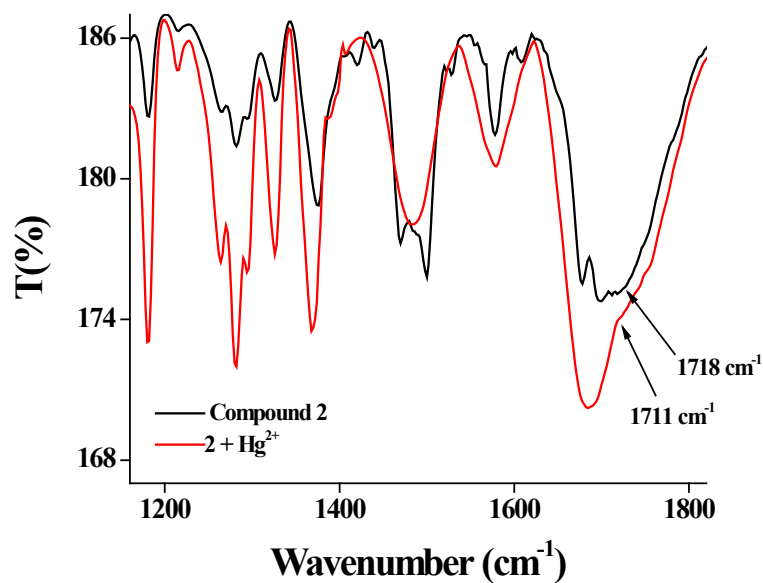

Fig. S15 FT-IR spectrum of **2** and **2**-Hg<sup>2+</sup>.

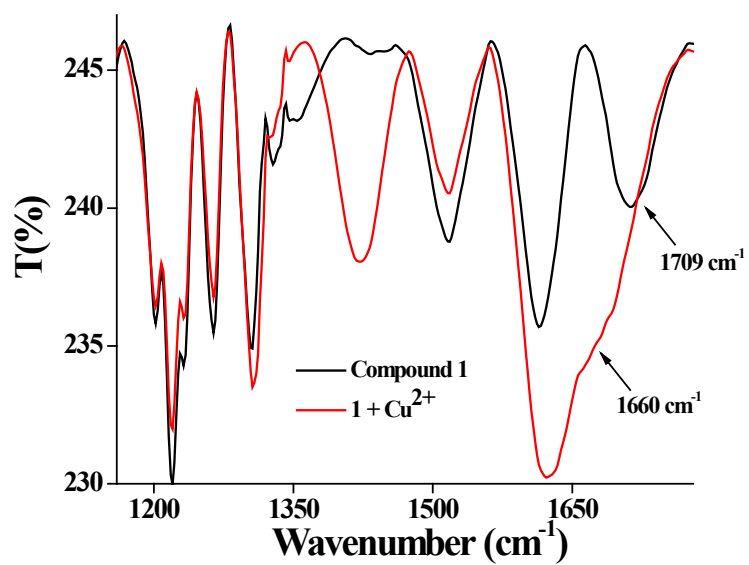

Fig. S16 FT-IR spectrum of **1** and **1**-Cu<sup>2+</sup>.

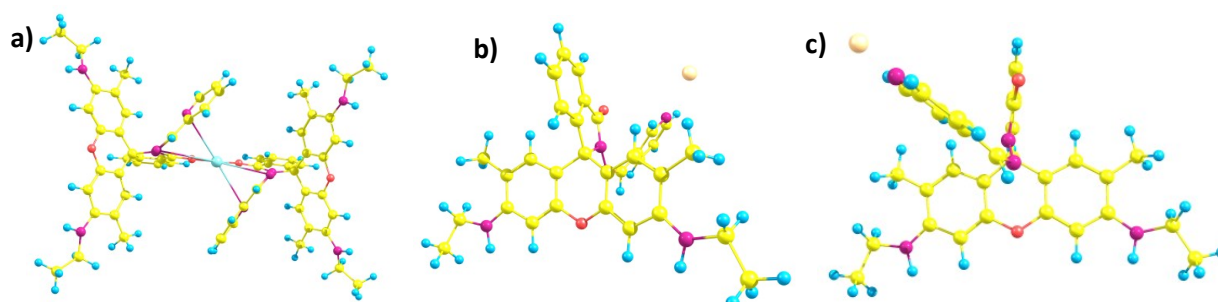

**Fig. S17** DFT optimized structures of **1**-Cu<sup>2+</sup>, **2**-Hg<sup>2+</sup> and **3**-Hg<sup>2+</sup> using B3LYP functional and LANL2DZ basis set.

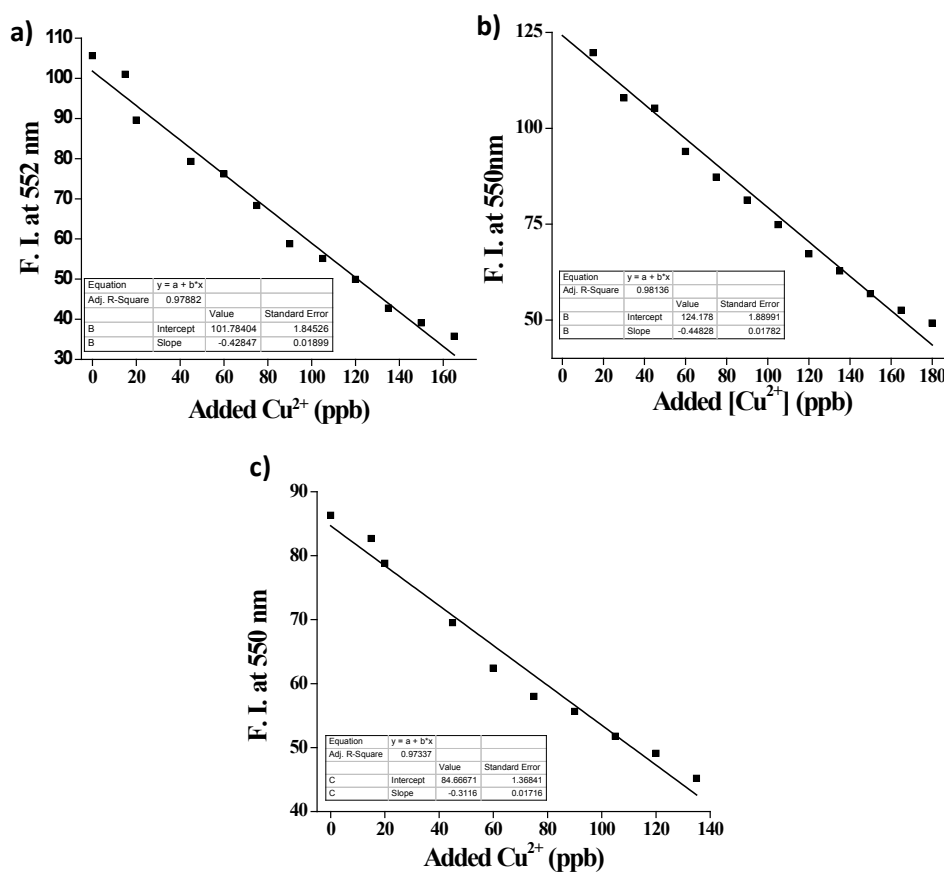

**Fig. S18** Changes in the fluorescence intensity of **1** (5 μM) ( $\lambda_{ex.} = 520$  nm) with the added Cu<sup>2+</sup> in (a) Tap water, (b) Sea water, and (c) swimming pool water.

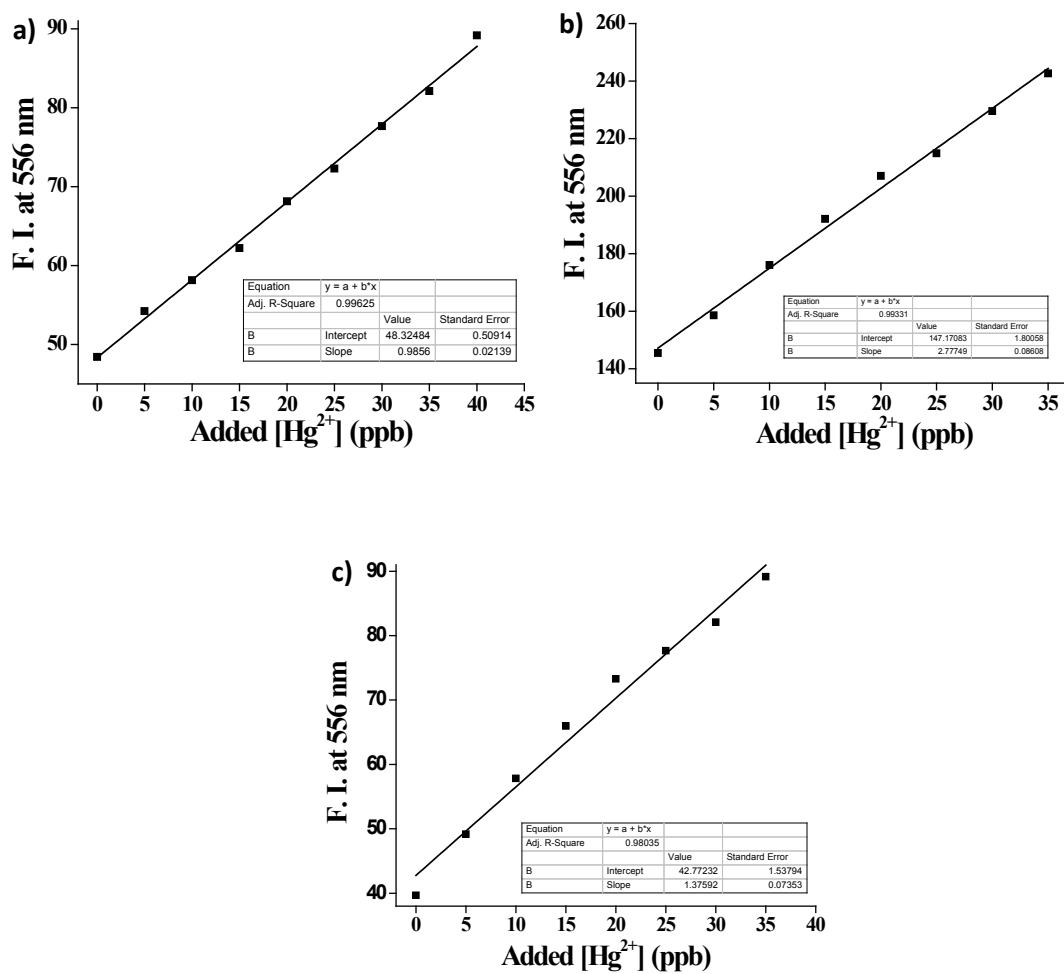

**Fig. S19** Changes in the fluorescence intensity of **3** (5  $\mu\text{M}$ ) ( $\lambda_{\text{ex.}} = 520 \text{ nm}$ ) in (a) Tap water, (b) Sea water, and (c) swimming pool water with added  $\text{Hg}^{2+}$ .

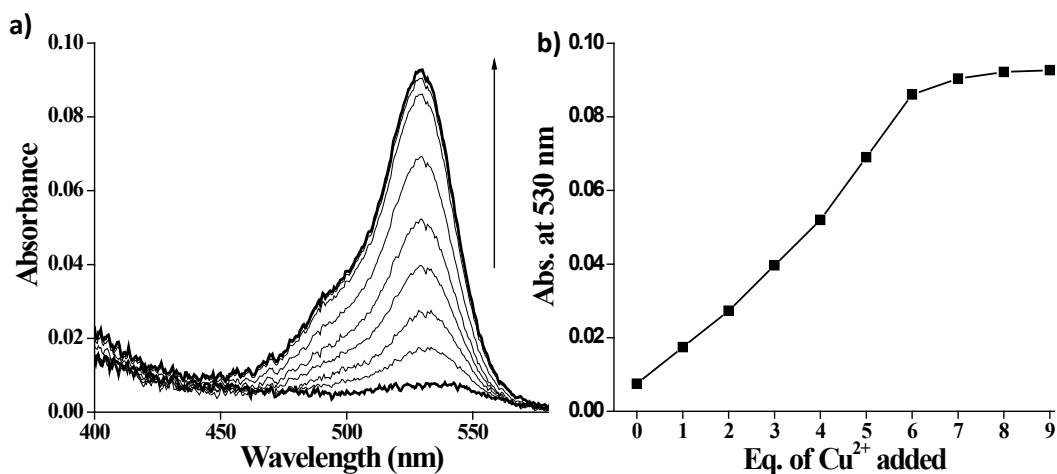

**Fig. S20** (a) UV-Vis titration of **1** (10 μM) in BSA (0.1 mg/mL) at pH 7.4 (HEPES buffer, 0.05 M) with Cu<sup>2+</sup> (0 to 90 μM). (b) Plot of change in the absorbance at 530 nm with the added Cu<sup>2+</sup> ion.

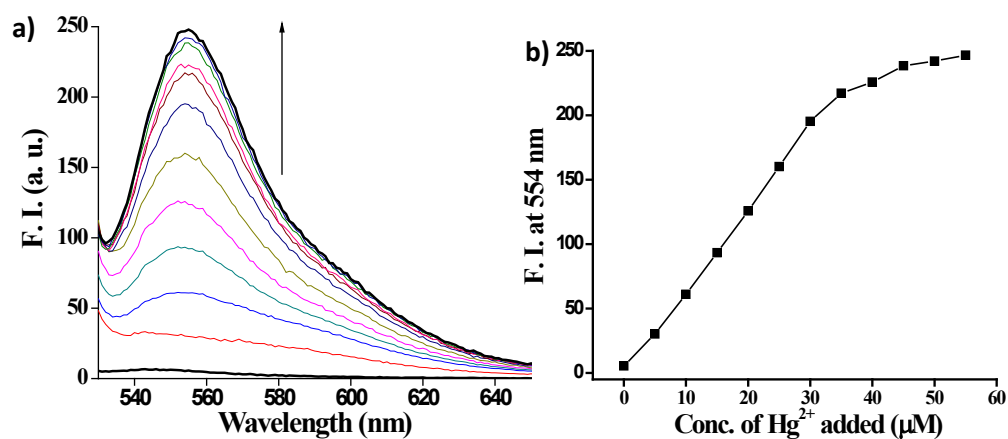

**Fig. S21** (a) Fluorescence titration of sensor **3** (5 μM) in water with Hg<sup>2+</sup> (λ<sub>ex</sub> = 520 nm) in presence of BSA (0.1 mg/mL). (b) Plot of the emission intensity at 554 nm with the added Hg<sup>2+</sup> ion.

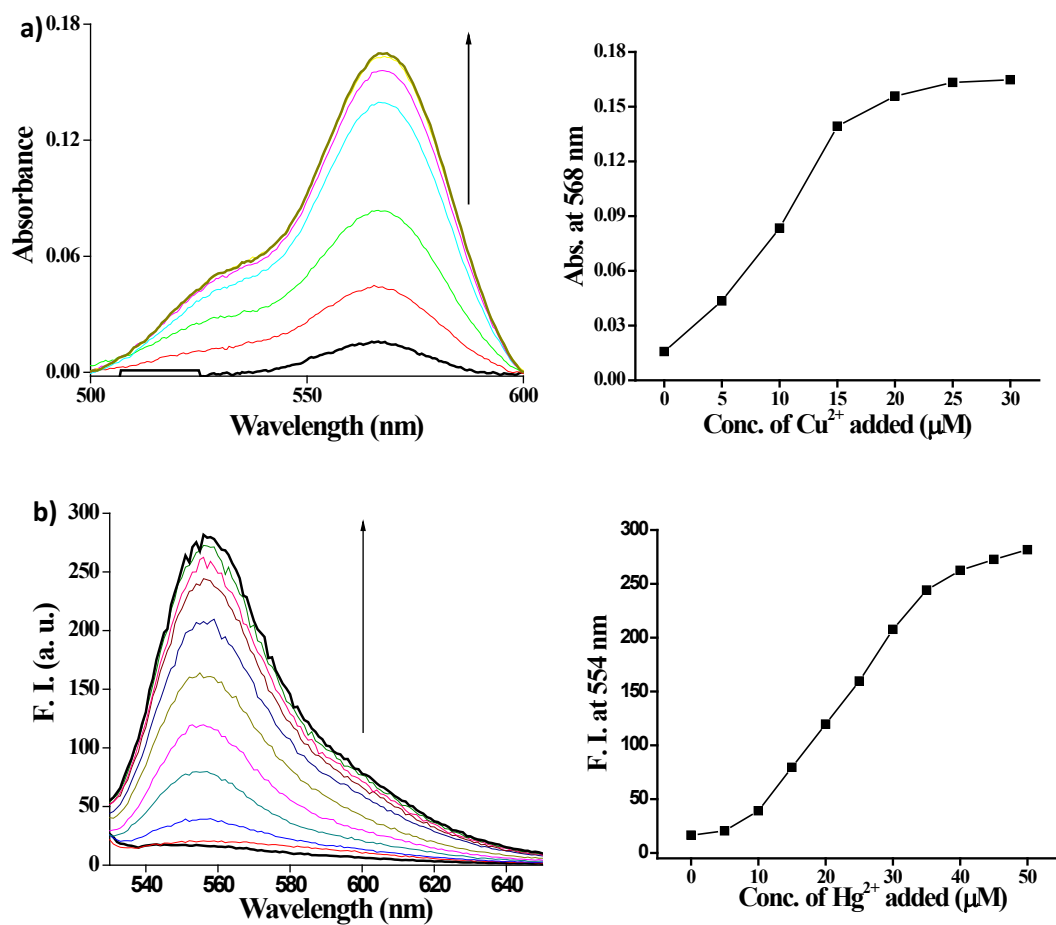

**Fig. S22** (a) UV-Vis titration of **1** (10 μM) in blood serum (100 μL) in water with Cu<sup>2+</sup> (0 to 30 μM) and the corresponding plot of the absorbance at 568 nm with the added Cu<sup>2+</sup> ion. (b) Fluorescence titration of sensor **3** (5 μM) in water with Hg<sup>2+</sup> ( $\lambda_{\text{ex}} = 520$  nm) (0 to 50 μM) in presence of blood serum and the corresponding plot of change in the emission intensity at 554 nm with the added Hg<sup>2+</sup> ion.

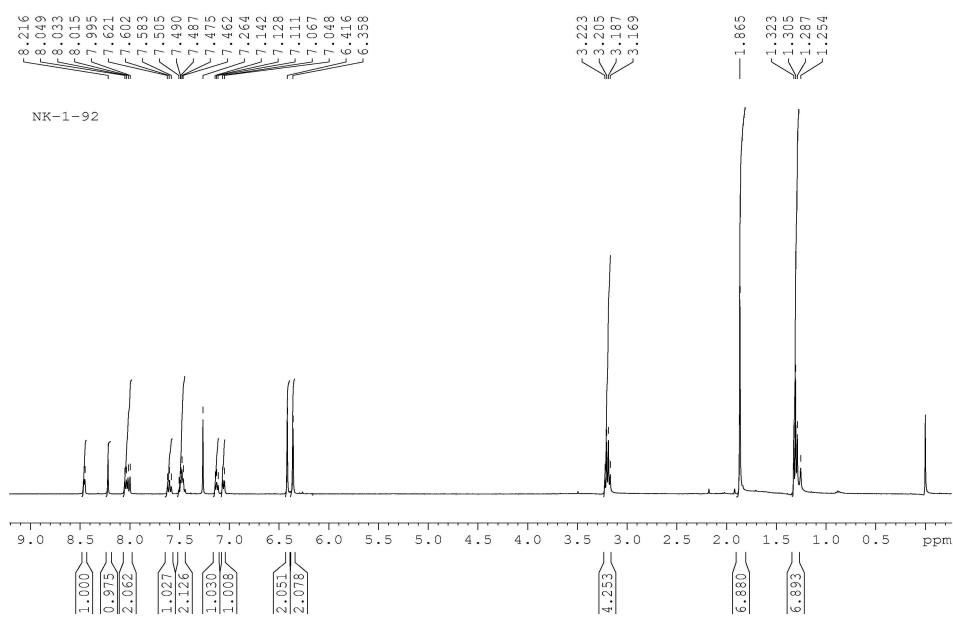

Fig. S23  $^1\text{H}$  NMR of compound 1.

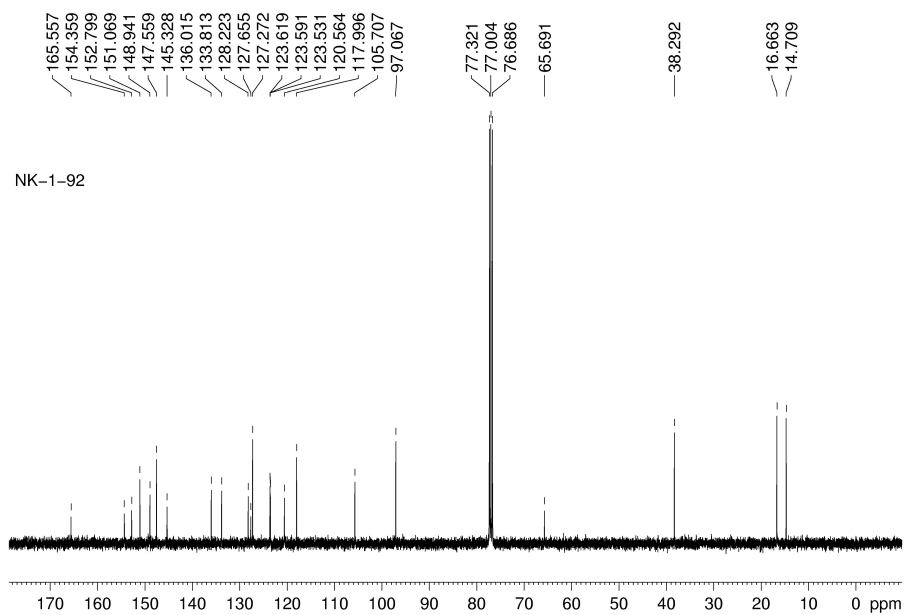

Fig. S24  $^{13}\text{C}$  NMR of compound 1.



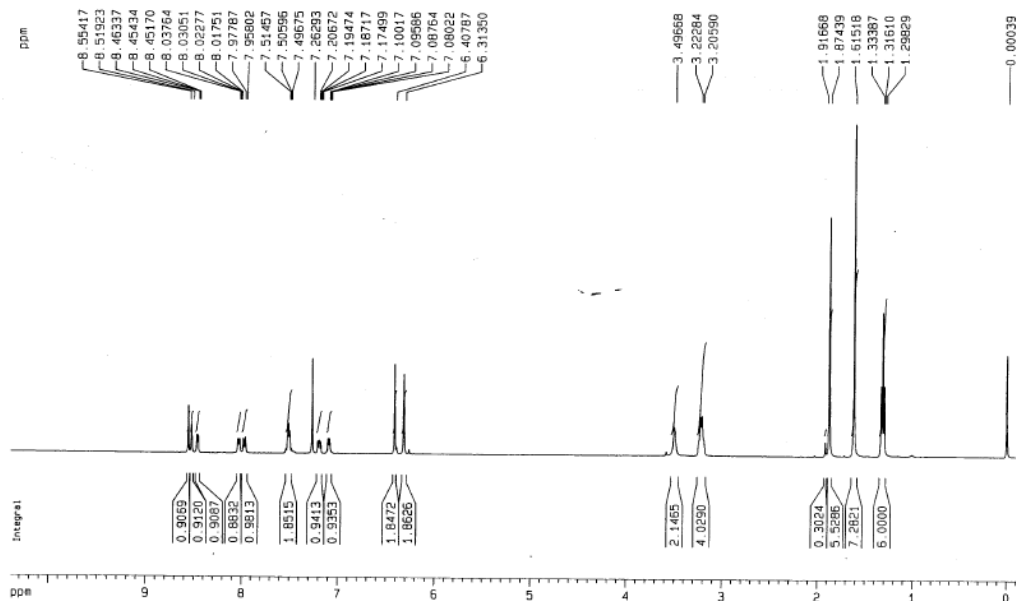

Fig. S25  $^1\text{H}$  NMR of compound 2.

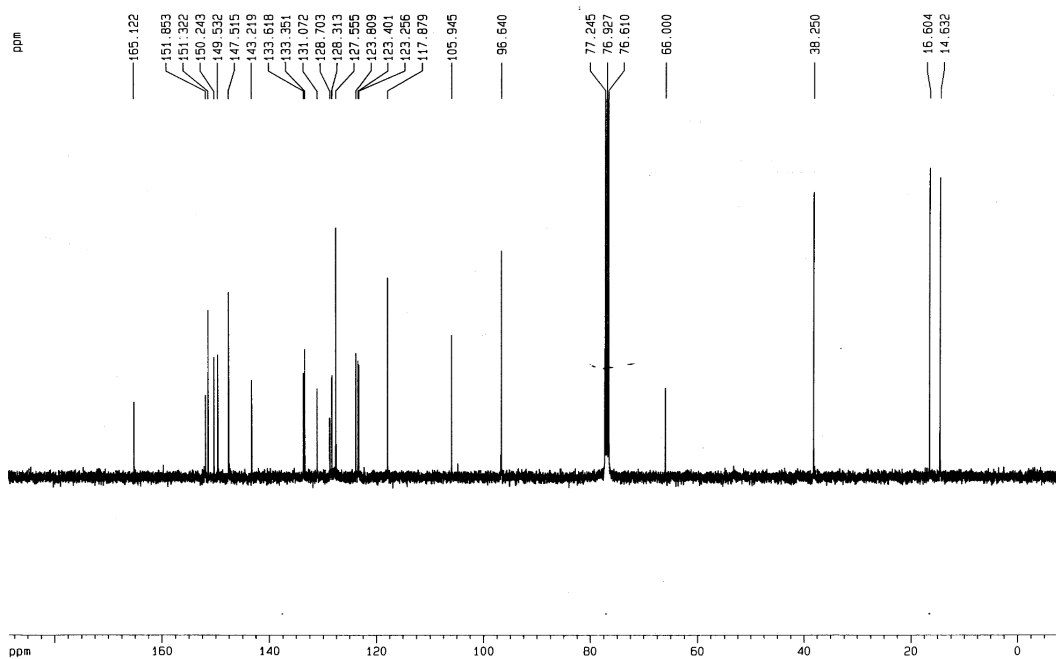

Fig. S26  $^{13}\text{C}$  NMR of compound 2.

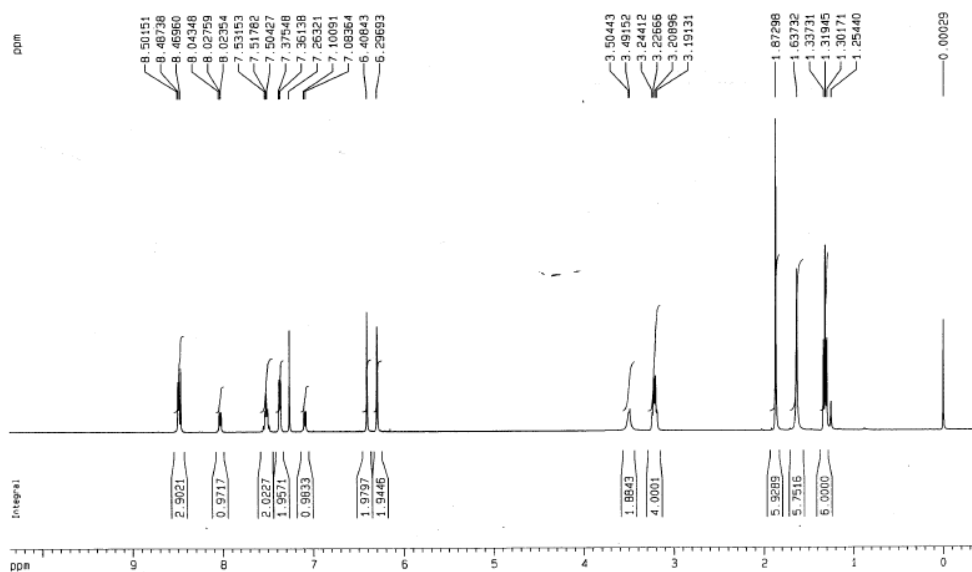

Fig. S27  $^1\text{H}$  NMR of compound 3.

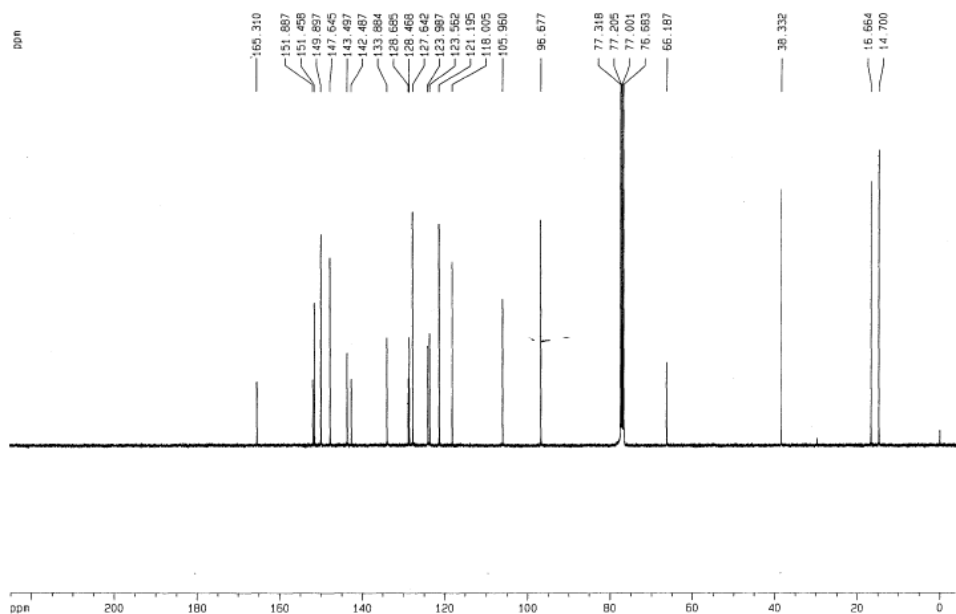

Fig. S28  $^{13}\text{C}$  NMR of compound 3.

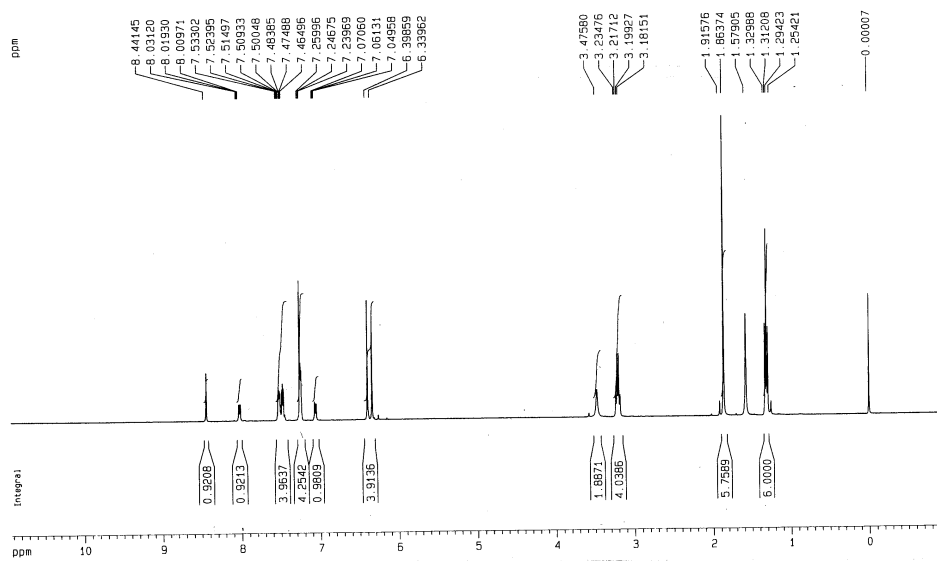

Fig. S29  $^1\text{H}$  NMR of compound 4.

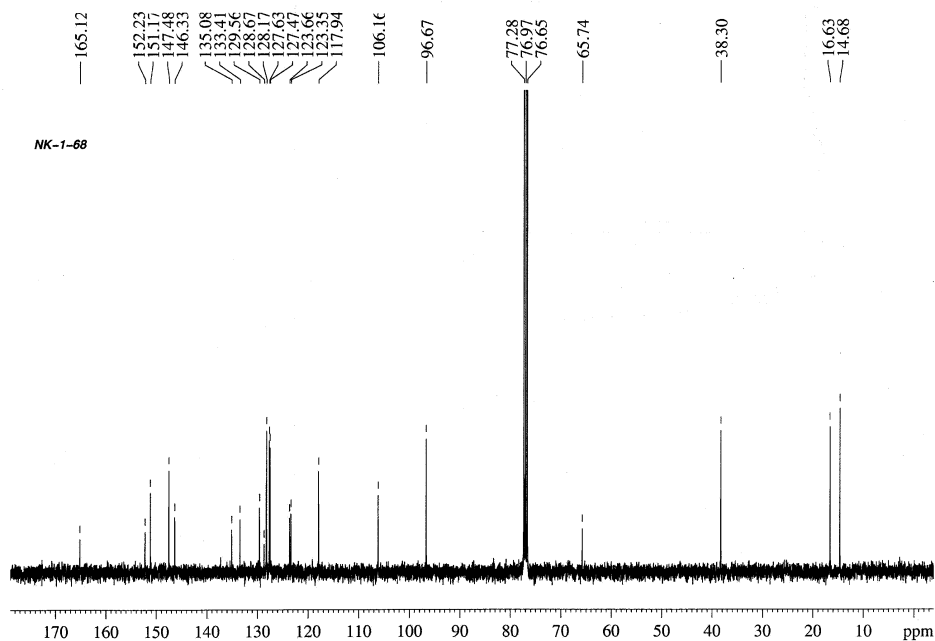

Fig. S30  $^{13}\text{C}$  NMR of compound 4.
